# Supplementary material for: Rapid construction of metabolite biosensors using domain-insertion profiling
Source: PubMed Central journal article supplement (PMC4974565; doi:10.1038/ncomms12266), 2016-07-29
Supplement: ncomms12266-s1.pdf [file ncomms12266-s1.pdf]

## Supplementary Information

a

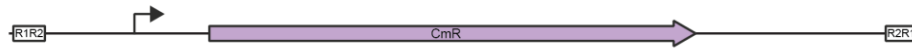

b

|           | Strand transfer                   | Efficiency |
|-----------|-----------------------------------|------------|
| Consensus | TGWNNYGTTCAYTNRAARYR...           |            |
| R1R2      | TGAAGCGGCGCACGAAAAACG...          | 100%       |
| BsrDI     | <u>TGCATTGC</u> CGCACGAAAAACG...  | 125%       |
| BtsI      | <u>TGACACTGC</u> GCACGAAAAACG...  | 84%        |
| EarI      | <u>TGAAGAAGAG</u> CACGAAAAACG...  | 75%        |
| Bsal-2    | <u>TGAAGGAGACC</u> ACGAAAAACG...  | 50%        |
| BsmBI-1   | <u>TGAAGGAGACC</u> ACGAAAAACG...  | 6%         |
| BsmBI-2   | TGAAGCGG <u>GAGAC</u> GAAAAACG... | 2%         |
| Bsal-1    | TGAAGCG <u>GAGAC</u> GAAAAACG...  | 15%        |
| BsmBI-3   | <u>TGAAGCGAGAC</u> GAAAAACG...    | 25%        |
| Bpil      | <u>TGAAGCGTCTTC</u> CGAAAAACG...  | 125%       |

c

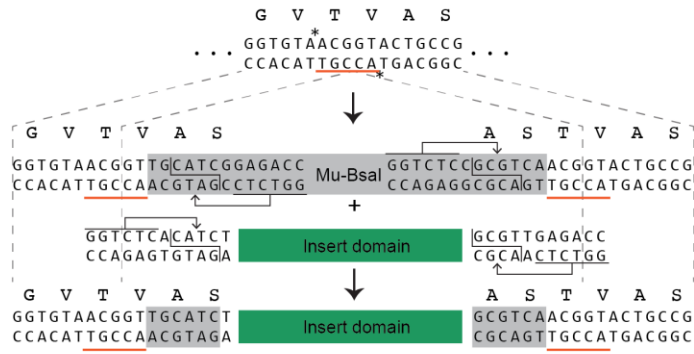

1 **Supplementary Figure 1:** Modified transposons for the creation of domain-  
 2 insertion libraries. (a) Schematic of a representative transposon used for *in vitro*  
 3 DNA insertion. The antibiotic resistance gene (CmR) is shown in purple, with its  
 4 promoter upstream. R1 and R2 MuA-binding sites are encoded at each end (exact  
 5 reverse complement of each other). (b) Transposition efficiency of modified  
 6 transposons. Alignment of modified transposon ends, shown 5' to 3', with Mu  
 7 genome consensus and original R1R2 end shown at the top for reference. Each  
 8 modified transposon is labeled with the restriction site that is created. Mutations  
 9 relative to original R1R2 ends are highlighted in blue. Restriction site recognition  
 10 sites are underlined, while cut sites are shown in purple. Note that all restriction  
 11 sites created are for type-IIs enzymes so sequences in the cut site can be varied at  
 12 both ends of the transposon to encode for desired amino acids while maintaining  
 13 the cloning site. (c) Schematic of cloning with the modified transposon, Mu-BsaI,  
 14 to create domain-insertion libraries. An example target sequence is shown at the  
 15 top, with encoded amino acids shown above. The sites of an example transposon  
 16 strand transfer are marked with asterisks. Insertion of Mu-BsaI transposon  
 17 creates a 5 bp duplication of the target sequence (underlined in orange). The  
 18 insert domain has compatible flanking restriction sites. An additional base (T in  
 19 this case) must be added in front of the insert domain to keep it in-frame. Colors  
 20 of the final assembly at the bottom highlight the source of DNA components. The  
 21 encoded amino acids VAS and AST are considered “linkers” because they are  
 22 additional relative to the original target and inserting-domain amino acid  
 23 sequence.

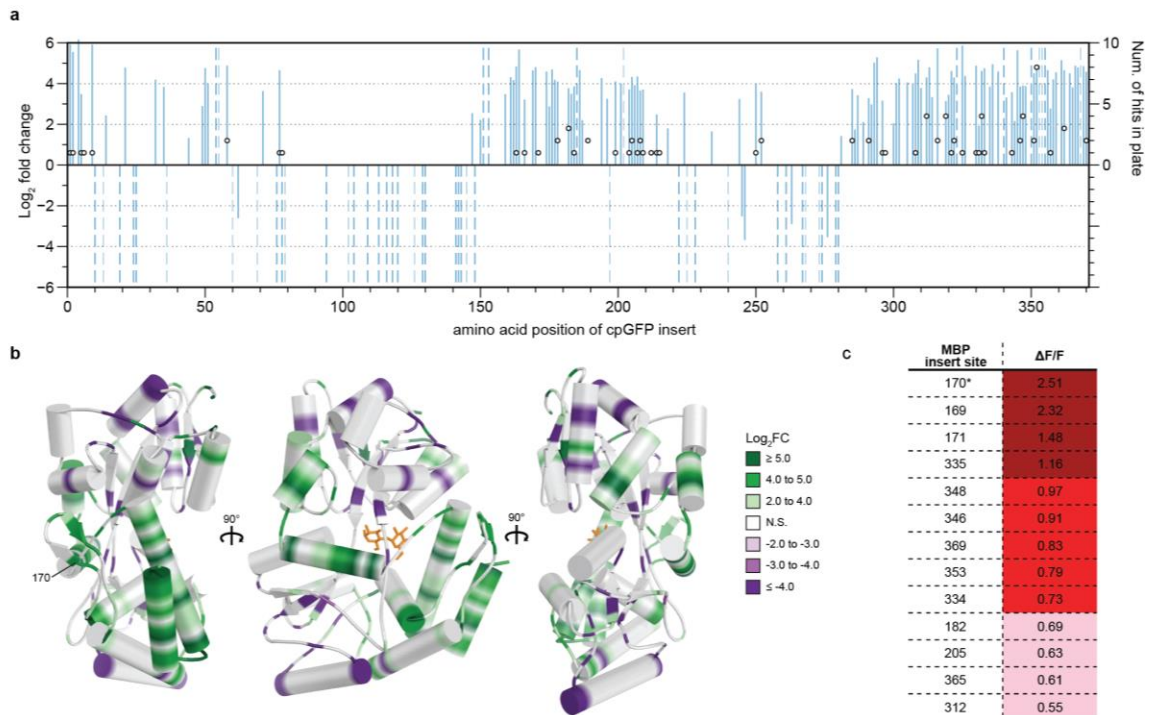

24

25

26 **Supplementary Figure 2:** Analysis of MBP library enrichment and sample  
 27 activity. **(a)** A profile of enrichment values (*i.e.* log<sub>2</sub> of fold change) for in-frame  
 28 insertions along the primary sequence of MBP. Enrichment calculated with  
 29 DESeq comparing post-sort NGS read counts to those from pre-sort library.  
 30 Calculated enrichment with  $P < 0.1$  shown. Sites that went from undetectable  
 31 (zero reads) to detectable are represented with dashed lines set to a value of 6.  
 32 Sites that were depleted post-sort are represented with dashed lines set to -6.  
 33 Overlaid black circles show the number of hits from a sequenced 96-well plate of  
 34 random post-sort library members (right side of y-axis). **(b)** Enrichment mapped  
 35 onto MBP crystal structure (PDB 1ANF). Cartoon representation of Figure 2b.  
 36 Bound maltose is shown in blue. Amino acid 170 indicated with arrows. **(c)** Table  
 37 of activity values from functional MBP-cpGFP constructs found in plate assays  
 38 (except site 170, marked with an asterisk, which was constructed afterwards).  
 39 Activity values are the mean of at least two biological replicates. Highlight colors  
 40 are the same as in Figure 2d.

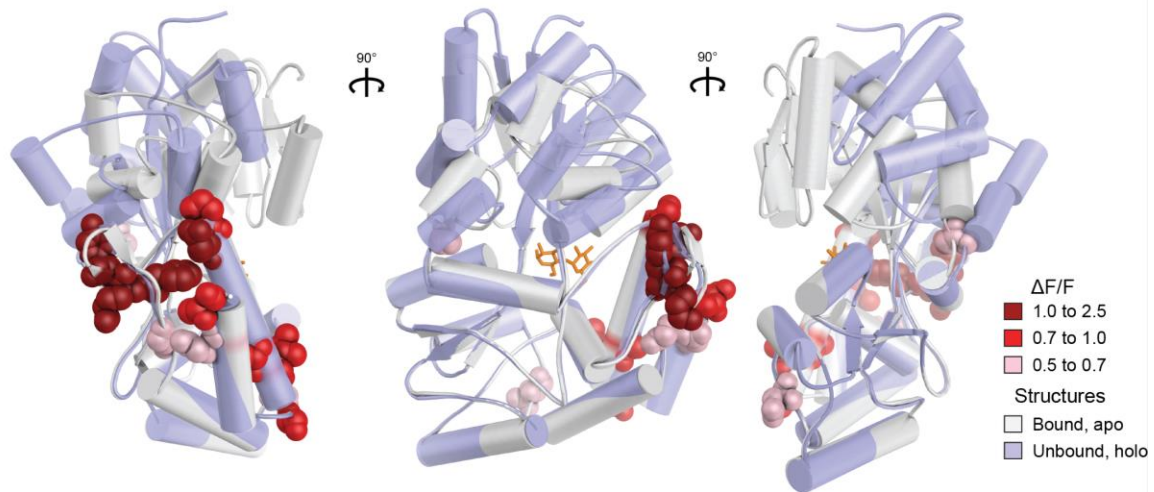

41

42

43 **Supplementary Figure 3:** MBP functional insertion sites shown relative to bound  
 44 and unbound structures. Maltose-bound MBP (1ANF, gray structure) shown  
 45 with functional insertion sites highlighted (from Figure 2c). Unbound MBP  
 46 (1OMP, light blue structure) is structurally aligned to the bound form. Alignment  
 47 was carried out with the align function of PyMOL using backbone atoms of  
 48 amino acids in the C-terminal lobe of the protein (amino acids 114-165, 185-257,  
 49 334-370).

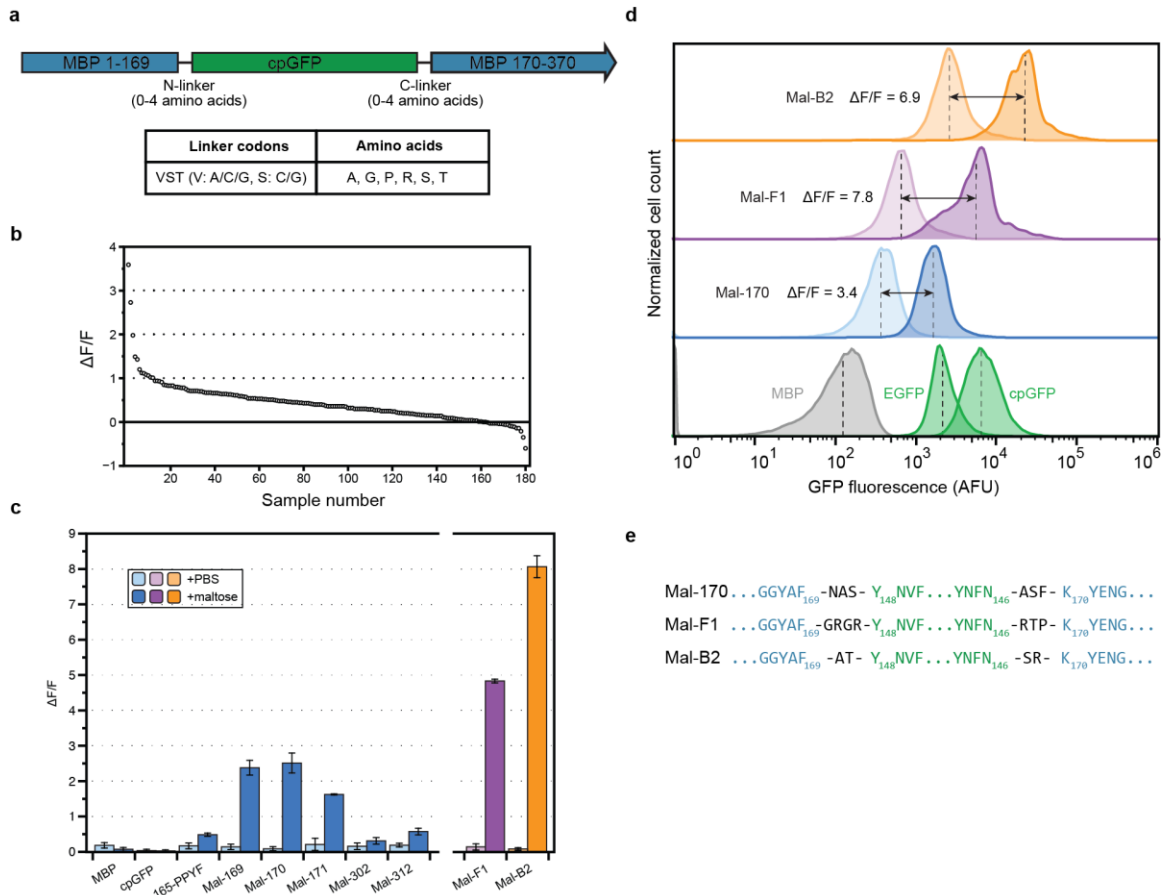

50  
51

**Supplementary Figure 4: Linker optimization of Mal-170.** (a) Schematic of the construct used for linker optimization. The N- and C-linkers vary from 0 to 4 amino acids, with each having equal probability of Ala, Arg, Gly, Pro, Ser, and Thr (VST codon). (b) Representative plate assay activity data of linker library (from naïve library – never sorted). (c) Activity measurements of top two hits with replicates (Mal-F1 and Mal-B2) compared to the best constructs from the original library. Values of  $\Delta F/F$  reported as mean  $\pm$  s.d. for three replicates. (d) Single cell measurements of best hits. Flow cytometry measurements of fluorescence either with (darker color) or without (lighter color) saturating maltose (1 mM), 20,000 measurements for each sample. Dashed lines represent the median of each sample.  $\Delta F/F$  values are reported next to biosensors, calculated from the median of each sample. (e) Linker amino acid sequences of the optimized biosensors, compared to Mal-170.

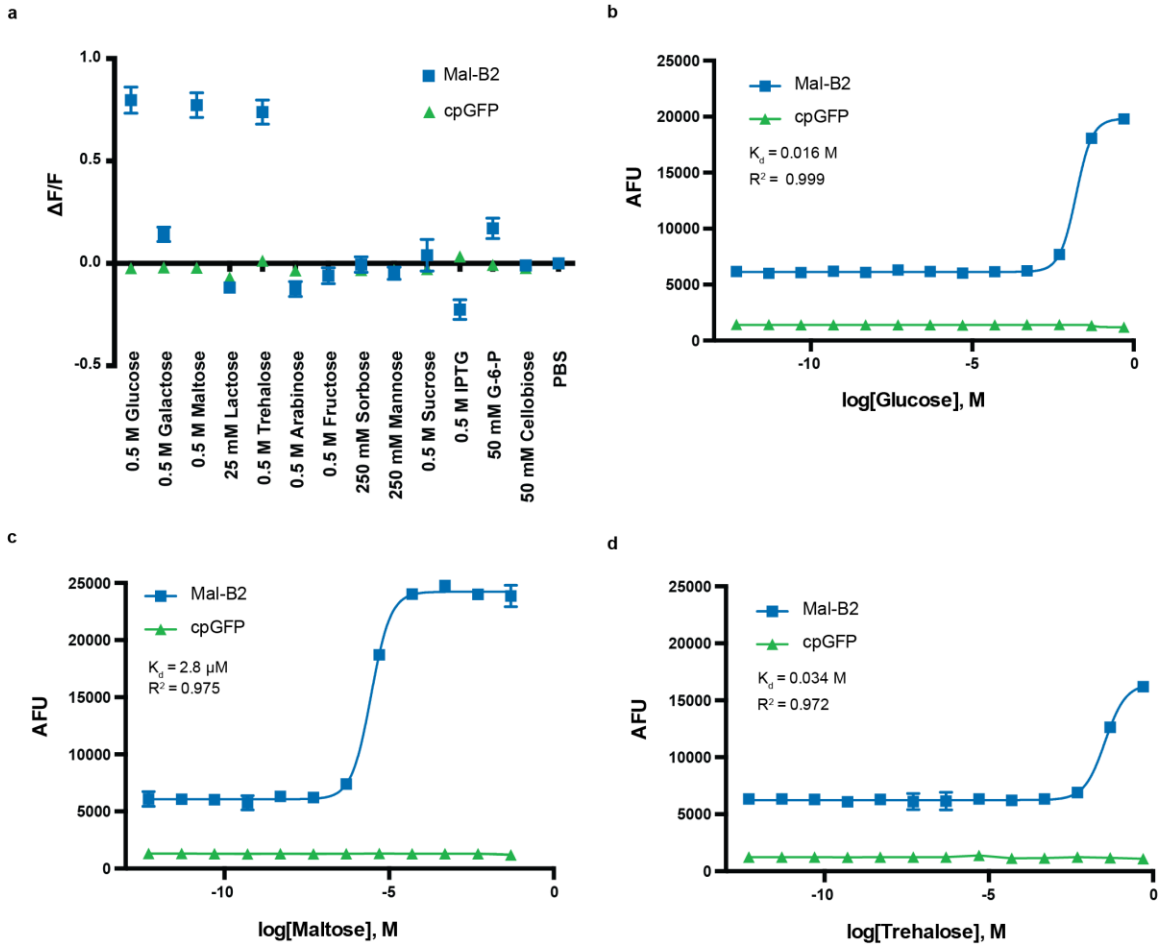

65  
66

67 **Supplementary Figure 5:** *In vitro* analysis of the best optimized MBP-cpGFP  
68 biosensor, Mal-B2. (a) Activity ( $\Delta F/F$ ) measurements with saturating sugars, as  
69 indicated. (b-d) Binding curves and  $K_D$  calculations for Mal-B2 with (b) glucose,  
70 (c) maltose, and (d) trehalose, the substrates showing the highest responses in (a).  
71 Data are mean  $\pm$  s.d. for three replicates.

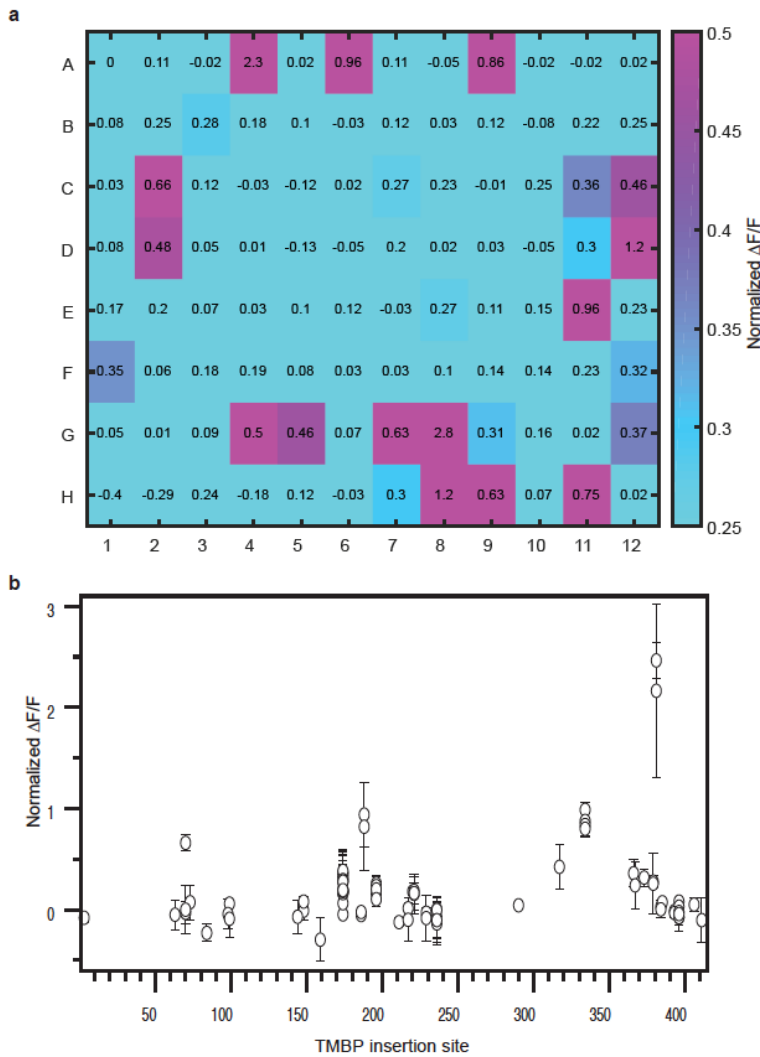

72  
73

74 **Supplementary Figure 6:** DIP enriches for functional trehalose biosensors. (a)  
75 Heat map, generated using MATLAB (Mathworks), identifying functional  
76 trehalose biosensors from a representative *in vivo* 96-well plate assay. Samples  
77 were grown for two hours post-IPTG induction and then 1 mM trehalose added.  
78 The normalized changes in fluorescence before and after trehalose addition were  
79 calculated. Wells are pseudocolored with a minimum normalized  $\Delta F/F$  of 0.25  
80 (blue) and a maximum of 0.5 (pink). Normalized  $\Delta F/F \geq 0.5$  identified positive  
81 hits. Samples A1, A2 and A3 are controls. A1 – media, A2 – TMBP, A3 – cpGFP.  
82 (b) DNA isolated from samples in (a), were sequenced and a plot of the  
83 normalized  $\Delta F/F$  values versus the insertion site generated. Data are mean  $\pm$  s.d.  
84 for three biological replicates (except Tre-217 which has only two replicates).

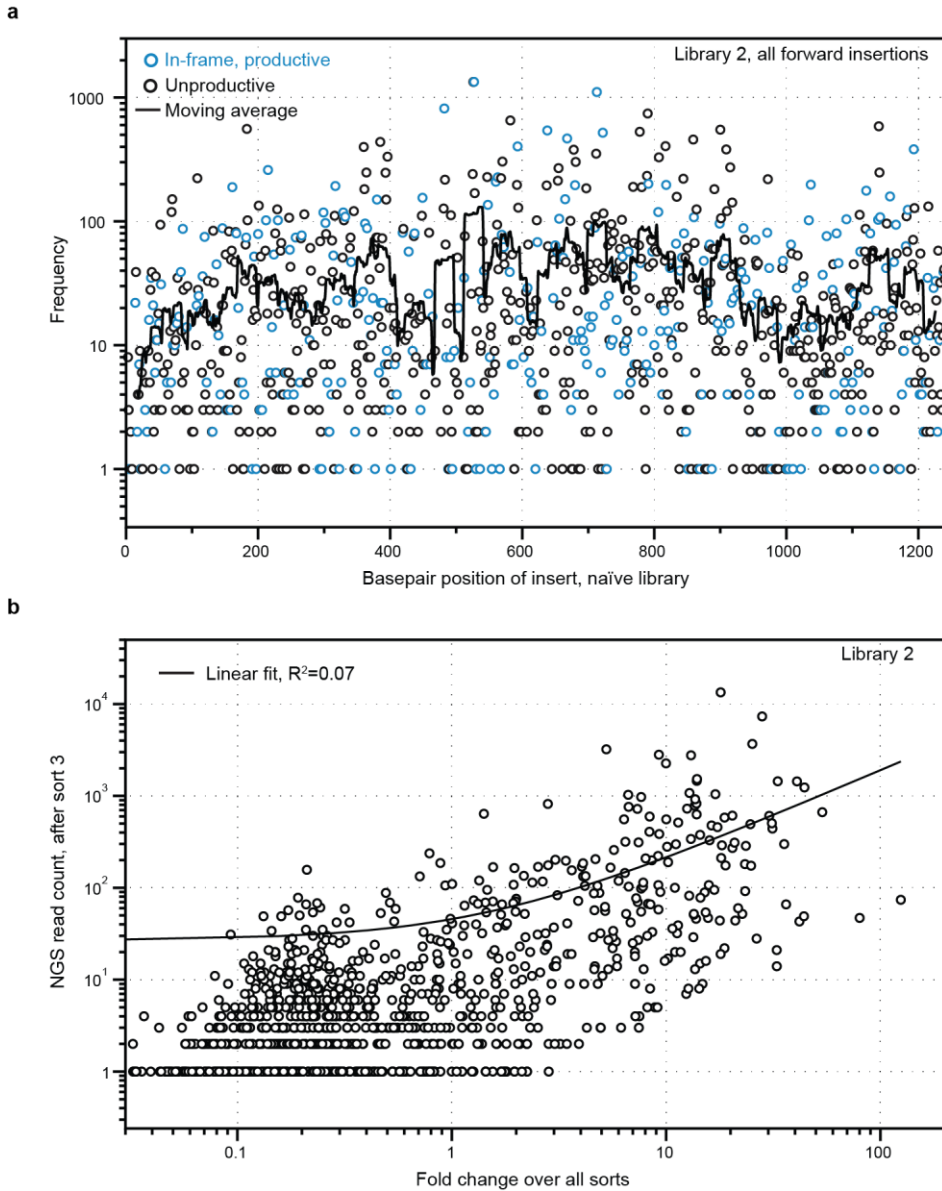

85  
86

87 **Supplementary Figure 7:** TMBP-cpGFP library construct frequency. (a)  
88 Representative initial library distribution of NGS read counts. Includes all  
89 forward insertions, with in-frame (productive) insertions shown in blue and out-  
90 of-frame (unproductive) insertions shown in black. A moving average is shown  
91 for all positions. (b) NGS read count versus enrichment after three rounds of  
92 FACS. Data is from one representative biological replicate. NGS read count is  
93 from the final library, after three sorts. Fold change is calculated from the read  
94 counts of the final library compared to those from the initial library. All insertion  
95 positions and directions that were detectable (both productive and  
96 unproductive) are shown. A linear fit, calculated with from all data points, is  
97 shown.

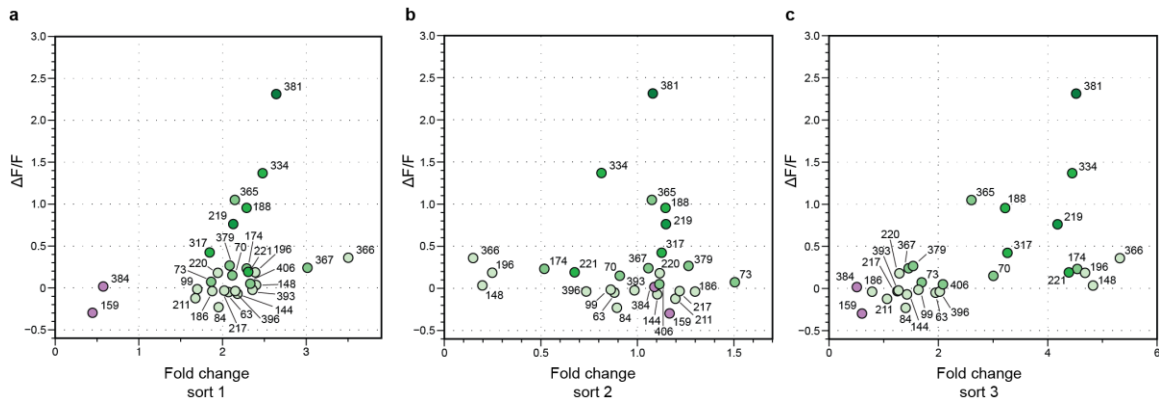

98

99

100 **Supplementary Figure 8:** Activity versus individual sort enrichments. Activity  
 101 shown is the same data from Figure 4a-b. Error of activity values is left off for  
 102 clarity. Enrichment, shown as fold change, is calculated with DESeq from two  
 103 biological replicates comparing NGS read counts post-sort to read counts pre-  
 104 sort. All constructs from Figure 4a-b are shown, regardless of calculated-  
 105 enrichment P-value for the given sort, to display overall trends. (a) Enrichment  
 106 from first sort (positive sort, with trehalose). (b) Enrichment from second sort  
 107 (negative sort, without trehalose). (c) Enrichment from third (final) sort (positive  
 108 sort, with trehalose). Colors of points in (a-c) are binned based on enrichment  
 109 (fold change) over all sorts (see x-axis in Figure 4b).



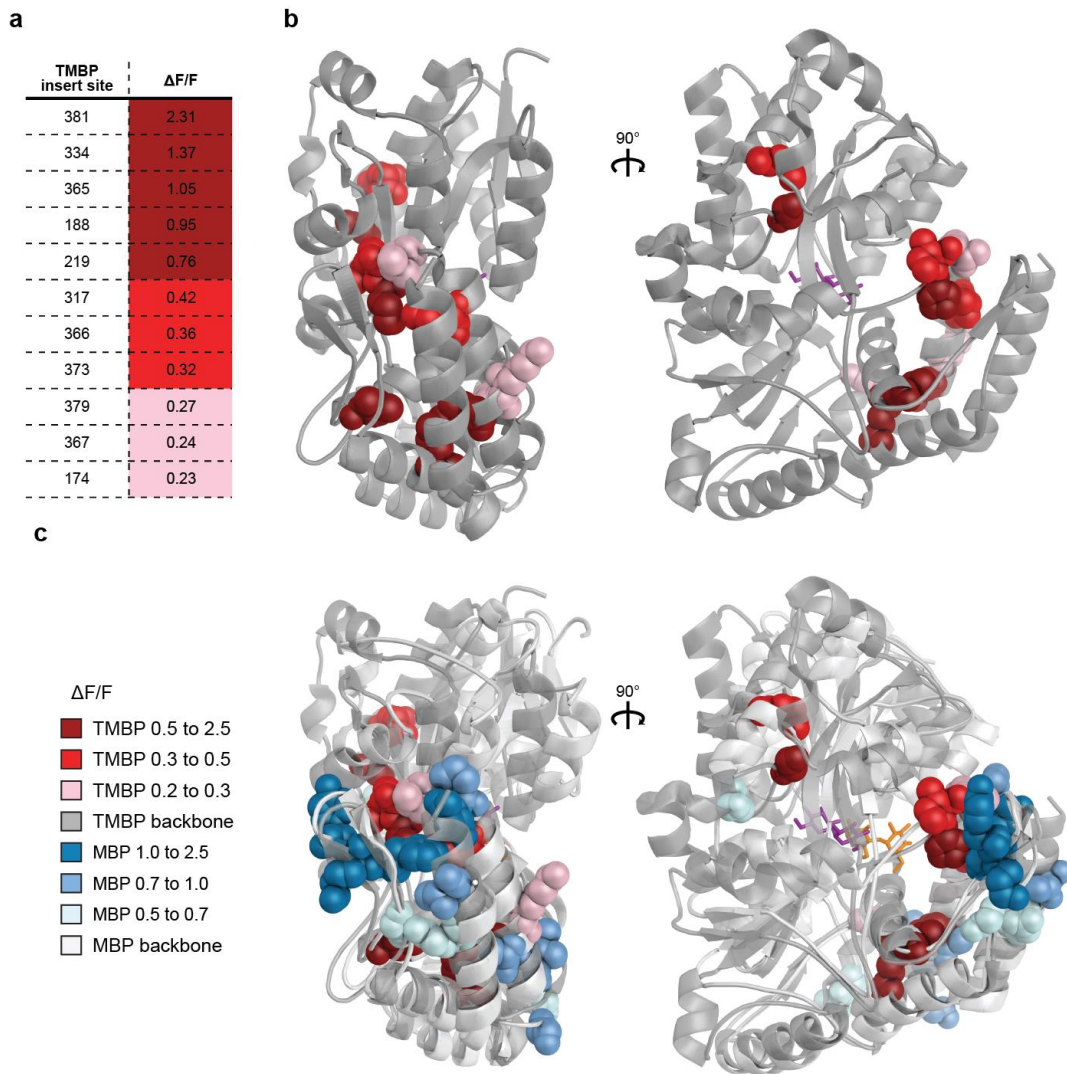

110

111

112 **Supplementary Figure 9:** Functional sites for TMBP-cpGFP biosensor constructs.

113 (a) Table of top activity measurements for different insertion positions. Activity ( $\Delta F/F$ )

114 values are those from Fig 4a. (b) Insertion positions of top biosensors

115 mapped on TMBP structure (1EU8). Highlighted sites are colored based on bins

116 in (a) and are shown with sphere representations of their side chains. Bound

117 trehalose is shown in purple. Note that, unlike MBP, TMBP only has a solved

118 crystal structure for its trehalose-bound form. (c) Structural alignment of TMBP

119 (gray) and MBP (white), both in ligand-bound forms, with highlighted functional

120 insertion sites. Alignment carried out in PyMOL and only uses residues near the

121 clustered hotspots to more accurately show proximity. TMBP sites use bin colors

122 shown in (a). MBP sites use bin values shown in supplementary Figure 2c, but

123 with blue instead of red coloring. Bound maltose is shown in orange and bound

124 trehalose shown in purple.

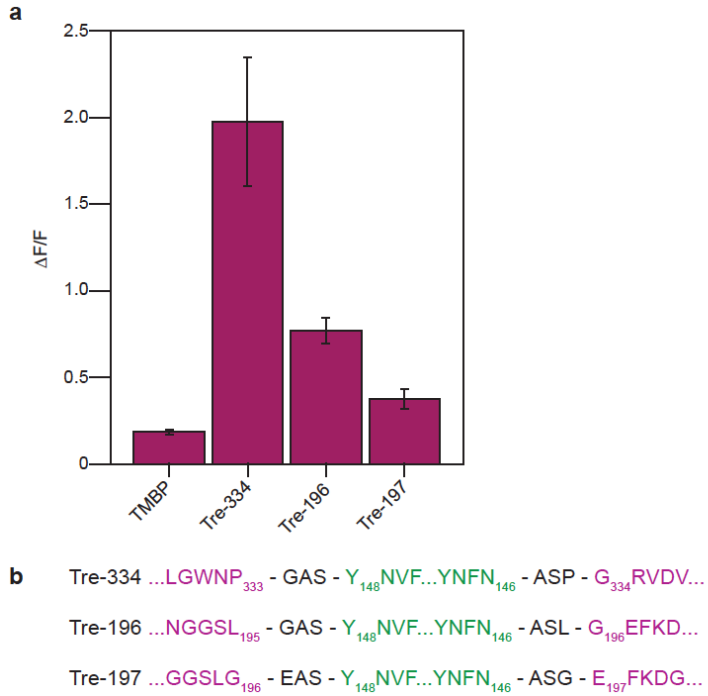

125  
126

127 **Supplementary Figure 10:** Construction of the homologous Mal-170 site in  
 128 TMBP does not produce a good trehalose biosensor. (a) The fluorescence  
 129 response of Tre-196 and Tre-197 to 1 mM trehalose in an *in vivo* plate assay  
 130 compared to a TMBP control and the isolated biosensor Tre-334. Data are mean ±  
 131 s.d. for three replicates. (b) Sequence of amino acids in the linker region of Tre-  
 132 334, Tre-196 and Tre-197.

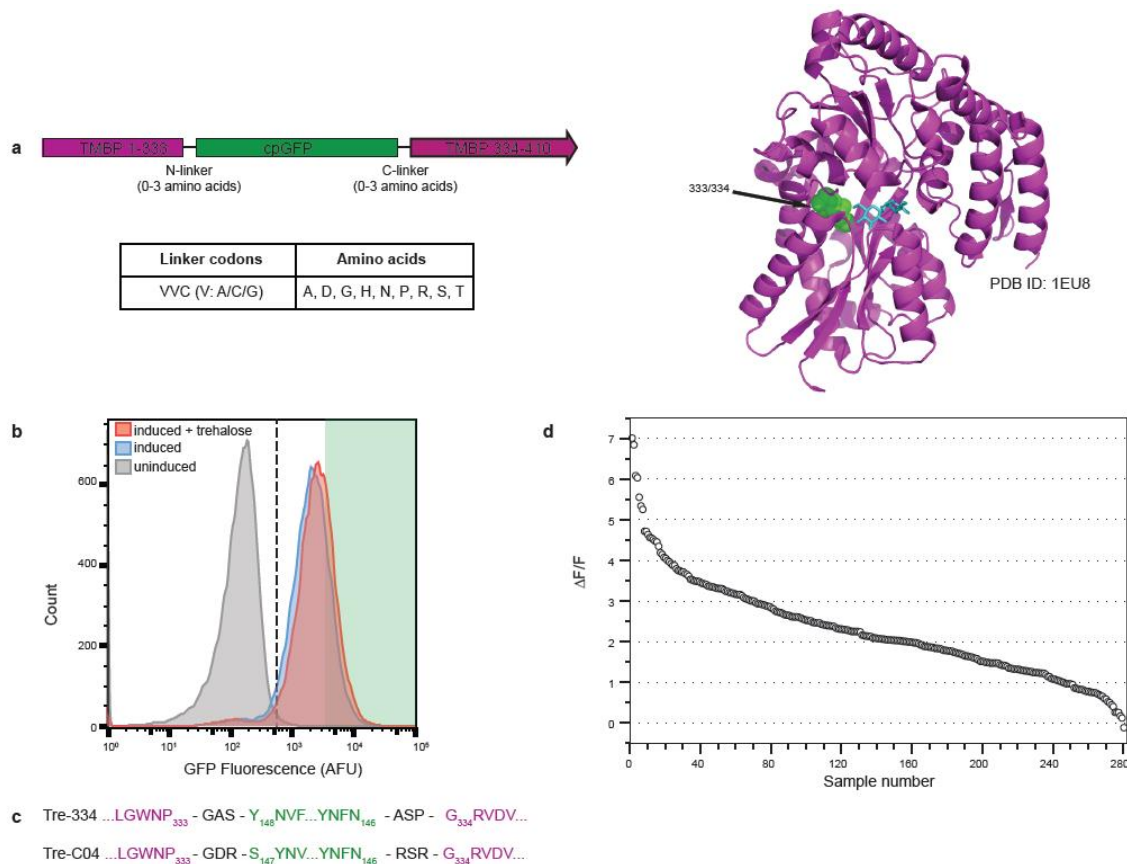

133  
134

135 **Supplementary Figure 11:** Linker optimization increases the dynamic range of  
 136 Tre-334. **(a)** A zero to three amino acid linker library (encoded by VVC codon)  
 137 was created between amino acids 333 and 334 of TMBP as shown in the  
 138 schematic and the PDB structure (PDB ID: 1EU8). The VVC codon provides equal  
 139 representation of 9 amino acids as indicated. **(b)** Changes in the fluorescence  
 140 histograms of the amino acid linker library upon IPTG induction and 1 mM  
 141 trehalose addition. 25,000 events are shown. The dashed line indicates events  
 142 that are at a non-fluorescent sample threshold and the shaded region indicates  
 143 the gate for sorted events in the induced sample treated with trehalose. **(c)** The  
 144 linker sequences of the parental and optimized trehalose biosensors, Tre-334 and  
 145 Tre-C04 are shown. **(d)** The  $\Delta F/F$  value of three 96-well plates tested in an *in*  
 146  *vivo* assay for trehalose sensing. Samples were grown for two hours post-IPTG  
 147 induction and then 1 mM trehalose added.  $\Delta F/F$  values were calculated from the  
 148 changes in fluorescence before and after trehalose addition.

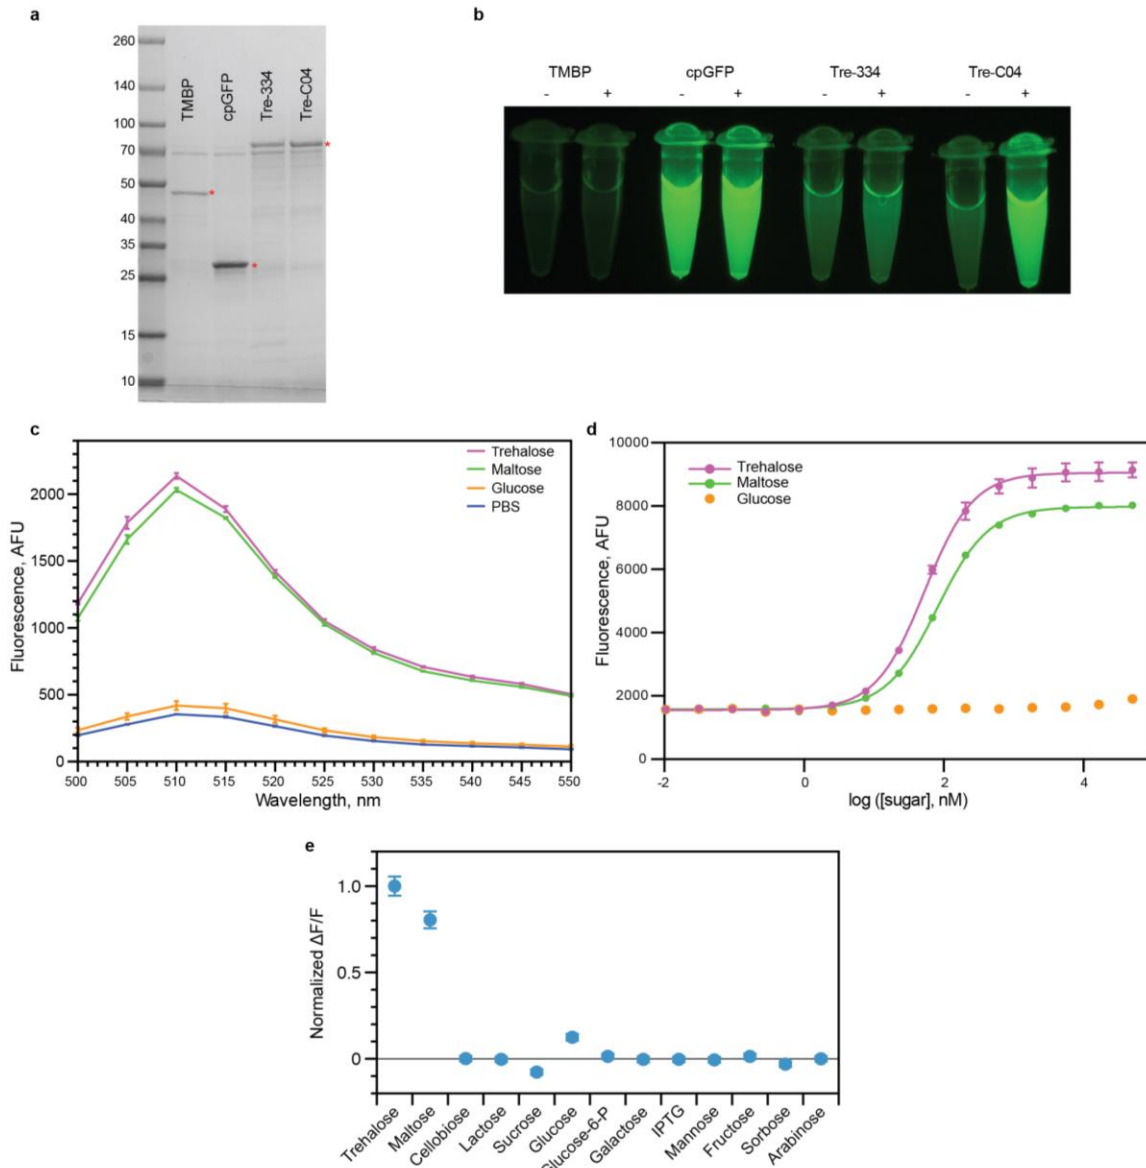

149  
 150 **Supplementary Figure 12:** Tre-C04 functions well *in vitro*. (a) SDS-PAGE of  
 151 expressed, Ni-NTA-purified proteins, as indicated. (b) Pseudocolored  
 152 fluorescence image of 1  $\mu$ M purified protein, as indicated, in the absence or  
 153 presence of 1 mM trehalose. (c) Fluorescence spectrum of purified, optimized  
 154 trehalose biosensor, Tre-C04, with PBS or added sugar. Data are mean  $\pm$  s.d. for  
 155 three samples. (d) Fluorescence dose-response curves of purified, optimized  
 156 trehalose biosensor, Tre-C04, to trehalose, maltose, and glucose. Data are mean  $\pm$   
 157 s.d. for three replicates. Apparent  $K_d = 53 \pm 1$  nM (trehalose) and  $81 \pm 1$  nM  
 158 (maltose). (e) Biosensor response measurements ( $\Delta F/F$  normalized to trehalose  
 159 response) of Tre-C04 with sugar substrates (1 mM). Data are mean  $\pm$  s.d. for three  
 160 replicates.

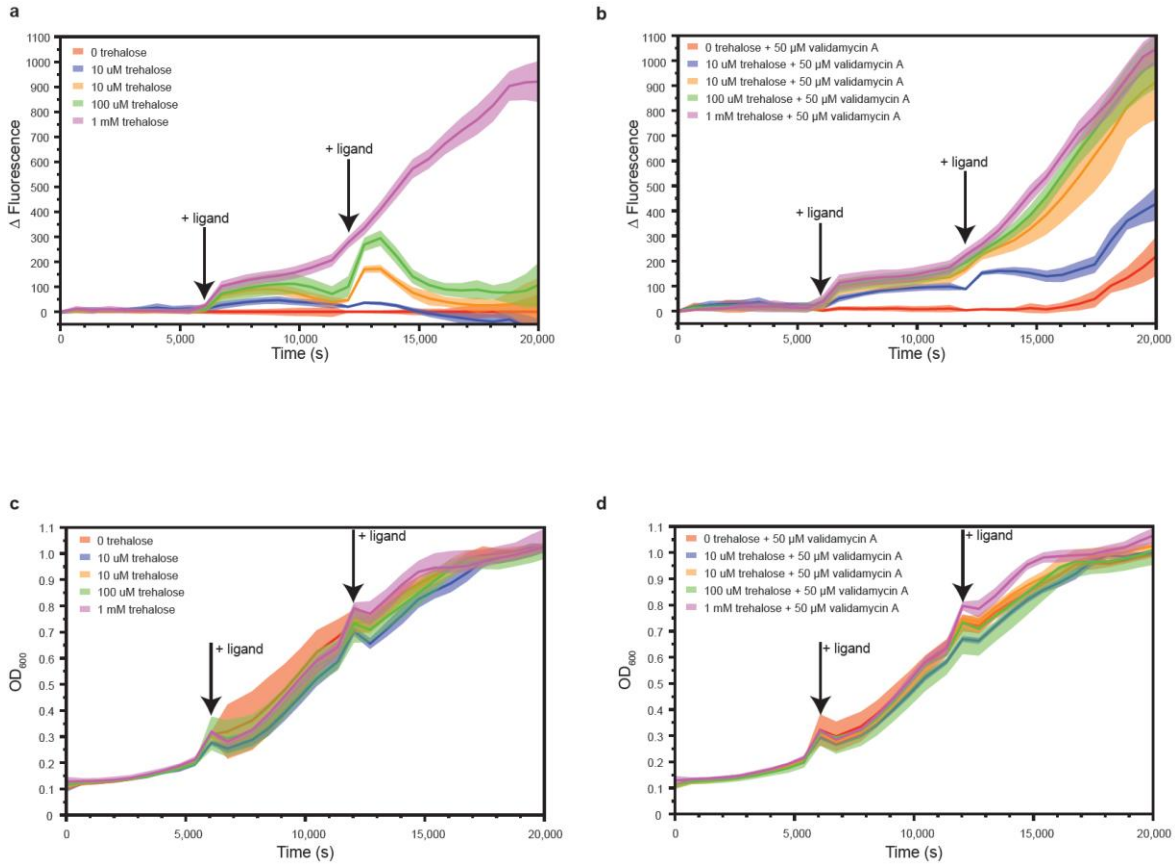

161  
 162  
 163  
 164  
 165  
 166  
 167  
 168  
 169  
 170  
 171  
 172  
 173

**Supplementary Figure 13:** Validamycin A treatment of cultures expressing Tre-C04 results in a sustained fluorescence response. **(a)** Fluorescence reponse of the optimized biosensor, Tre-C04, to 0, 1  $\mu$ M, 10  $\mu$ M, 100  $\mu$ M and 1 mM trehalose. Fluorescence was background corrected against a culture treated with water instead of trehalose. **(b)** Fluorescence reponse of the optimized biosensor, Tre-C04, to 50  $\mu$ M validamycin A and 0, 1  $\mu$ M, 10  $\mu$ M, 100  $\mu$ M or 1 mM trehalose. Fluorescence was background corrected against a culture treated with water instead of trehalose. **(c)** OD<sub>600</sub> for samples shown in (a). **(d)** OD<sub>600</sub> for samples shown in (b). For **(a-d)**, arrows indicate additions and data are mean  $\pm$  s.d. for twelve replicates.

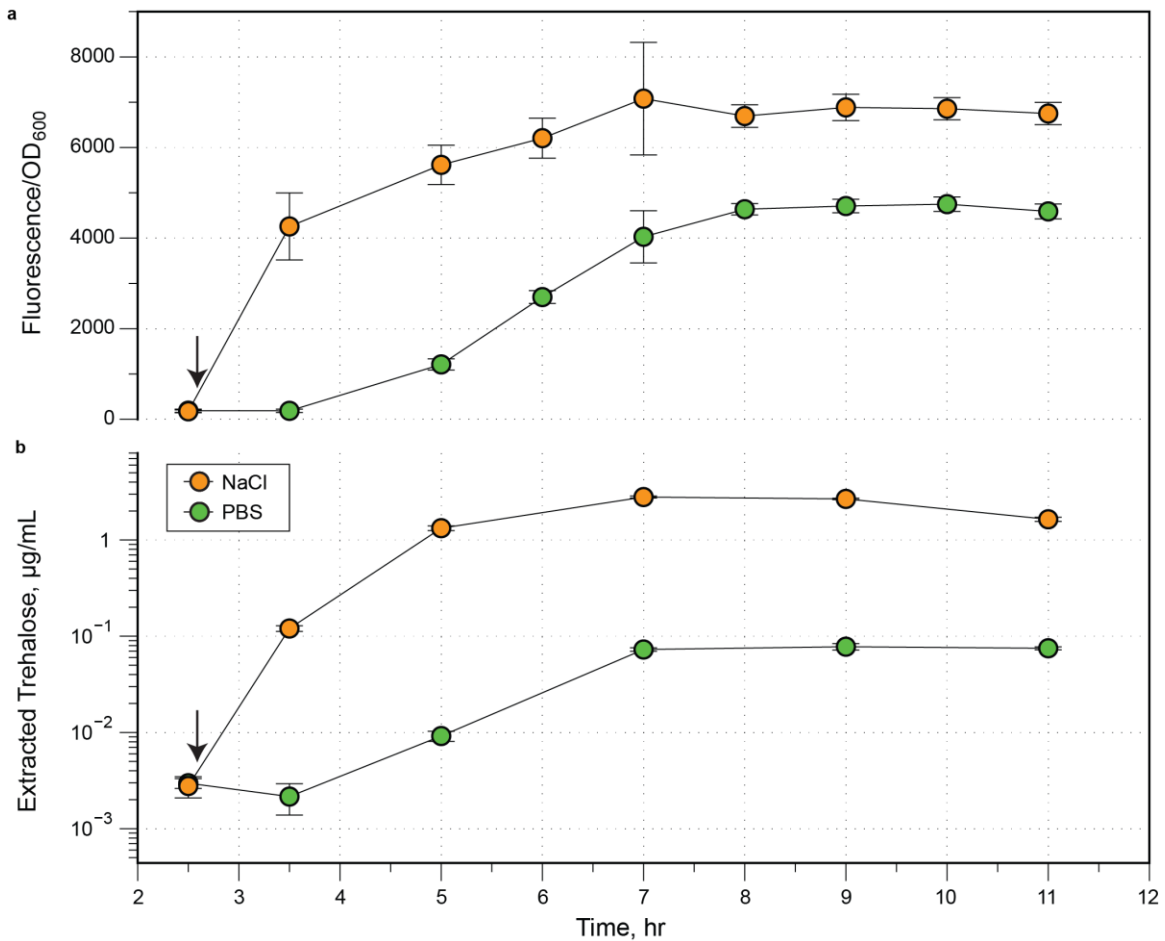

174  
 175  
 176  
 177  
 178  
 179  
 180  
 181  
 182

**Supplementary Figure 14:** Extraction and measurement of free sugars during *in vivo* NaCl exposure. (a) Fluorescence response of Tre-C04 to the addition of PBS or 300 mM NaCl (final concentration). Arrow indicates time of additions. Data are mean  $\pm$  s.d. for three biological replicates. (b) Concentration of trehalose in cell extracts from cultures in (a) measured by HPAEC-PAD analysis. Data are mean  $\pm$  s.d. for three biological replicates. No maltose was detected for all culture conditions and time points (limit of detection  $\sim$ 0.05  $\mu$ g/mL).

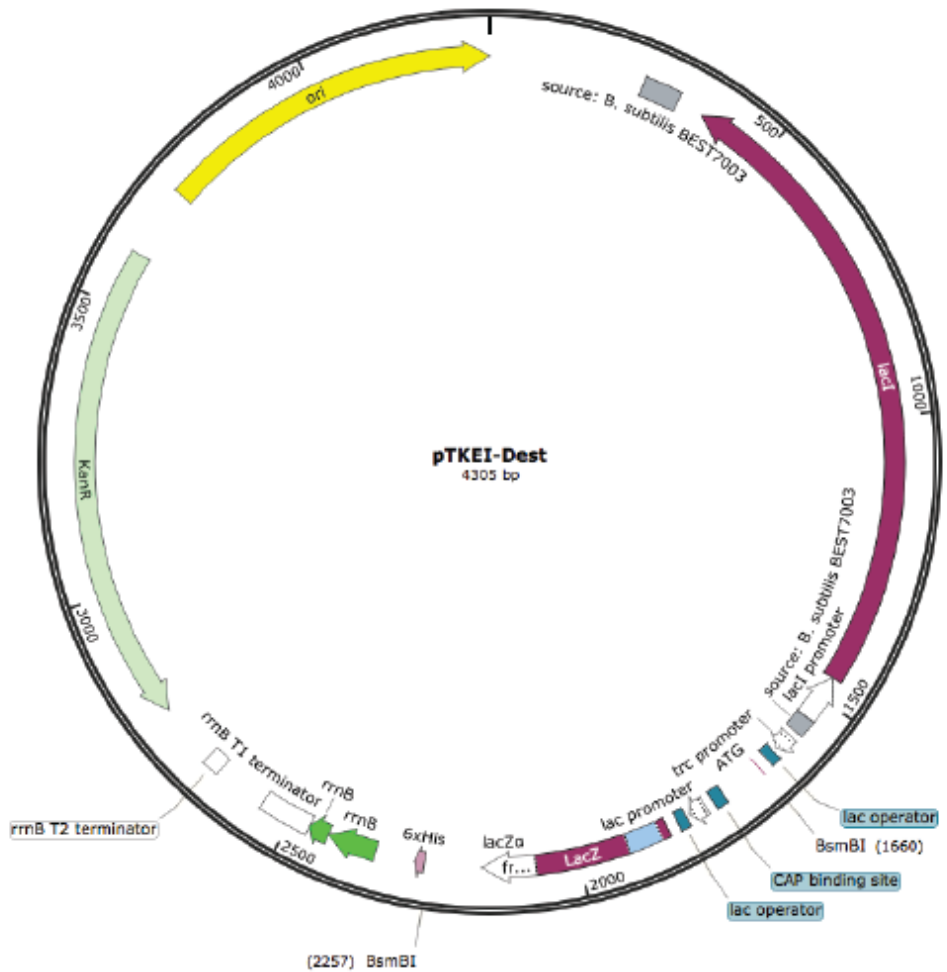

183

184

185 **Supplementary Figure 15:** pTKEI-Dest plasmid map. Generated with SnapGene  
 186 software (GSL Biotech).

**Supplementary Table 1: DNA sequences.** For primers, lower case letters indicate bases that anneal to the template

| Type   | Name                 | Sequence                                                                                                                                                                                                                                                                                                                                                                                                                                                                                                                                                                                                                                                                                                                                                                                                                                                                                                                                                                                                                                                                                                                                                                                                                                                                                                       |
|--------|----------------------|----------------------------------------------------------------------------------------------------------------------------------------------------------------------------------------------------------------------------------------------------------------------------------------------------------------------------------------------------------------------------------------------------------------------------------------------------------------------------------------------------------------------------------------------------------------------------------------------------------------------------------------------------------------------------------------------------------------------------------------------------------------------------------------------------------------------------------------------------------------------------------------------------------------------------------------------------------------------------------------------------------------------------------------------------------------------------------------------------------------------------------------------------------------------------------------------------------------------------------------------------------------------------------------------------------------|
| ORF    | MBP                  | AAAATCGAAGAAGGTAACCTGGTAATCTGGATTAACGGCGATAAAGGCTATAACGGACTCGCTGA<br>AGTCGGTAAGAAATTCGAGAAGATACCGGAATTAAGTCACCGTTGAGCATCCGGATAAATCGG<br>AAGAGAAATCCACAGGTTGCGCAACTGGCGATGGCCCTGACATTATCTTCTGGGCACACGAC<br>CGCTTTGGTGGCTACGCTCAATCTGGCCTGTTGGCTGAAATCACCCGGACAAAGCGTTCCAGGA<br>CAAGCTGTATCCGTTTACCTGGGATGCCGTACGTTACAACGGCAAGCTGATTGCTTACCCGATCG<br>CTGTTGAAGCGTTATCGCTGATTTATAACAAAGATCTGCTGCCGAACCCGCCAAAAACCTGGGAA<br>GAGATCCCGCGCTGGATAAAGAAGCTGAAAGCGAAAGGTAAGAGCGCGCTGATGTTCAACCTGCA<br>AGAACCCTACTTACCTGGCCGCTGATTCTGCTGACGGGGTTATCGCTTCAAGTATGAAAAACG<br>GCAAGTACGACATTAAGACGTGGGCGTGGATAACGCTGGCGGAAAGCGGGTCTGACCTTCTCTG<br>GTTGACCTGATTAACAAACAAACACATGAATGCAGACACCGATTACTCCATCGCAGAAGCTGCCCT<br>TAATAAAGGCGAAACAGCGATGACCATCAACGGCCCTGGGATGGTCCAACATCGACACCGAGCA<br>AAGTGAATTATGGTGAACGGTACTGCCGACCTCAAGGGTCAACCTCCAAACCGTTCTGTTGGC<br>GTGCTGAGCGCAGGTATTAACGCCGCGAGTCCGAACAAGAGCTGGCGAAAGAGTTCTCTGAAAA<br>CTATCTGCTGACTGATGAAGTCTGGAAGCGGTTAATAAAGACAAACCGCTGGGTGCCGTAGCGC<br>TGAAGTCTTACGAGGAAGAGTTGGCGAAAGATCCACGATTGCGGCCACCATGAAAAACGCCAG<br>AAAGGTGAAATCATGCCGAACATCCCGCAGATGTCGCTTTCTGGTATGCCGTGCGTACTGCGGT<br>GATCAACGCCGCCAGCGGTCTGACACTGTCGATGAAGCCCTGAAAGACGCCGACACTCGTATCA<br>CCAAG                                                                                                      |
| ORF    | TMBP                 | AAAATCGAGGAAGGTAATAATGTTGTTGTCAGTGGGTGGCGCCCGAATGAAATCGAATATTGGAA<br>AGGTGTTATTGCGGAATTCGAGAAAAATATCTTGGGGTTACAGTGGAGCTGAAACGCCAGGCCA<br>CCGATACCGAACAGCGTCTGATCTGGTAAATGCGCTTCGCGGGAAAAAGCTCCGACCTGAT<br>GTATTCCTGATGGACGTCGCGTGGTGGTCACTGCTTCTGCTTGGTGGTGGTGGTGGTGGTGGT<br>CGATTATGTTCAAAAAGACAATTATGACCTGAGCGTGTCTTTCAGTGGTATTAACCTTGGCG<br>ACAAACAGGGCGCAACTGTATGCCCTGCCGCTGTATATTGATGACGGTCTGCTGTACTATCGT<br>AAAGTCTTCTTGAATAACGGCTATTCTAAGCCGCGGAAACATGGCAGGAAGTGGTGGAGAT<br>GGCCAAAAAATTCAGTCGGGGGAGCGGAAACCAACCCAAATTTTGGGGTTTTGTTTGGCAGG<br>GCAACAATACGAGGGCTGGTGTGCGACTTCTGGAGTACGTGACTCAACGGCGGAAAGCTTA<br>GGTGAATTTAAAGACGGCAAGTGGTCCCAGCTTTGAACAACCGGAAATGTTGAGGCCCTGCA<br>ATTCATGGTGGATCTGATCCACAAGTATAAGATTTGCGCTCCAAACACCTACACGGAAATGACGG<br>AAGAACCAGTACGCTGATGTTTCAACAGGGCAACGCGCGTTCGAGCGTAATGGCCATATGCT<br>TGGGGCTGCATAATGCTGACGATTCTCCAGTGAAGGCAAAAGTCGTTGGCCCGCTTGGCCACA<br>TTTTCCGGGCATAAAAAGCGCGCTACCTGGTGGTGGCAGATTGGTATTAGCAAGTATAGCG<br>ACAATAAAGCCTTGGCGTGGGAATTTGTGAAATTCGTAGAAAAGTTATAGCGTCCAGAAAAGGATTT<br>GCGATGAATTTGGTGGAAATCCCGGGCGCGTAGACGTATACGACGATCCGGCGGTGGTGTCCAA<br>AAGCCCATCTGAAAGAGCTGCGTGGTGGTGGTGGTGGTGGTGGTGGTGGTGGTGGTGGTGGTGGT<br>ATTACCCGAACTGAGTGAATCATCCAGAAATACGTTAACTCCGCCCTTGCAGGCAAAATCTCC<br>CCGAGGAAGCACGGATAAAGCTCAAAAAGAAGCCGAAGAATGGTAAAGCAGTATTC |
| ORF    | cpEGFP               | TATAACGCTTTATCATGGCCGACAGCAGAAGAAGGCAATCAAGGGCAACTCAAGATCCGCCA<br>CAACATCGAGGACGGGGCGTGCAGCTCGCTATCACTACCAGCAGAACCCCCATCGGGCAGC<br>GCCCGTGTGCTGCCGACAACTACTGAGCGTGCAGTCCAAACTGAGCAAGACCCCAAC<br>GAGAAGCGCGATCACATGGTCTGCTGGAGTTCGTGACCGCCCGGGATCACTCTGGCATGGA<br>CGAGCTGTACAAGGGCGTACCGAGGGAGCATGGTGGAGCAAGGGCGAGGAGCTGTACCCGGGG<br>TGGTGCCTCCTGGTGCAGCTGGACGGCGACGTAACGGCCACAAGTTACGCGTGTCCGGCGAG<br>GGCGAGGGGATGCCACCTACGGCAAGCTGACCCTGAAGTTCTATGCACCACCGGCAAGCTGCC<br>CGTGCCCTGGCCACCCTCGTGACCACCTGACCTACGGCGTGCAGTCTTACGCGCTACCCCG<br>ACCACATGAAGCAGCAGACTTCTTCAAGTCCGCCATGCCGAAGGCTACATTAGGAGCGCACC<br>ATCTTCTTCAAGGACGACGGCAACTATAAGACACGCGTGCAGGTAAAGTTCGAGGGCGACACTCT<br>GGTTAACCGCATCGAGCTGAAGGGCATCGACTTCAAGGAGGACGGCAACATCTGGGCCATAAGC<br>TTGAATATAACTTCAAC                                                                                                                                                                                                                                                                                                                                                                                                                                                                                                                                         |
| primer | entranceposon_Ins1_F | CACACCAGGTCTCAGTCCCGAGAGGATTAgatctgAAgcGgcgcacgaaaaacg                                                                                                                                                                                                                                                                                                                                                                                                                                                                                                                                                                                                                                                                                                                                                                                                                                                                                                                                                                                                                                                                                                                                                                                                                                                         |
| primer | entranceposon_Ins1_R | CACACCAGGTCTCAAtctcattttcgcaaaaag                                                                                                                                                                                                                                                                                                                                                                                                                                                                                                                                                                                                                                                                                                                                                                                                                                                                                                                                                                                                                                                                                                                                                                                                                                                                              |
| primer | entranceposon_Ins2_F | CACACCAGGTCTCAagaTggtgatcggcagcgaagag                                                                                                                                                                                                                                                                                                                                                                                                                                                                                                                                                                                                                                                                                                                                                                                                                                                                                                                                                                                                                                                                                                                                                                                                                                                                          |
| primer | entranceposon_Ins2_R | CACACCAGGTCTCAACacgaaaaacatattctcaataaac                                                                                                                                                                                                                                                                                                                                                                                                                                                                                                                                                                                                                                                                                                                                                                                                                                                                                                                                                                                                                                                                                                                                                                                                                                                                       |
| primer | entranceposon_Ins3_F | CACACCAGGTCTCAgtGtcagccaatccctgg                                                                                                                                                                                                                                                                                                                                                                                                                                                                                                                                                                                                                                                                                                                                                                                                                                                                                                                                                                                                                                                                                                                                                                                                                                                                               |
| primer | entranceposon_Ins3_R | CACACCAGGTCTCACGCTATACATAGCAAAGCTTGAAGcGgcgcacgaaaaacg                                                                                                                                                                                                                                                                                                                                                                                                                                                                                                                                                                                                                                                                                                                                                                                                                                                                                                                                                                                                                                                                                                                                                                                                                                                         |
| primer | CmR_int_R_bsai       | CACACCAGGTCTCAcgtaacagccacatcttgcg                                                                                                                                                                                                                                                                                                                                                                                                                                                                                                                                                                                                                                                                                                                                                                                                                                                                                                                                                                                                                                                                                                                                                                                                                                                                             |
| primer | CmR_int_F_bsai       | CACACACGGTCTCAacggtgaaaacctggcctatttcc                                                                                                                                                                                                                                                                                                                                                                                                                                                                                                                                                                                                                                                                                                                                                                                                                                                                                                                                                                                                                                                                                                                                                                                                                                                                         |
| primer | CmR_int_R_bsmbi      | CACACCAGGTCTCAcgtaacagccacatcttgcg                                                                                                                                                                                                                                                                                                                                                                                                                                                                                                                                                                                                                                                                                                                                                                                                                                                                                                                                                                                                                                                                                                                                                                                                                                                                             |
| primer | CmR_int_F_bsmbi      | CACACACGGTCTCAacggtgaaaacctggcctatttcc                                                                                                                                                                                                                                                                                                                                                                                                                                                                                                                                                                                                                                                                                                                                                                                                                                                                                                                                                                                                                                                                                                                                                                                                                                                                         |
| primer | Mu-BsrDI-GG-F        | CACACACGGTCTCAGTCCagatctgCaTgCcgccacgaaaaacgcaaacg                                                                                                                                                                                                                                                                                                                                                                                                                                                                                                                                                                                                                                                                                                                                                                                                                                                                                                                                                                                                                                                                                                                                                                                                                                                             |



|        |                    |                                                               |
|--------|--------------------|---------------------------------------------------------------|
| primer | Mu-BsrDI-GG-R      | CACACCAGGTCTCAGCTaagcttgCaTTgCgcgacgaaaaacgcgaaagc            |
| primer | Mu-BtsI-GG-F       | CACACACGGTCTCAGTCCagatctgaCACtgcgacgaaaaacgcgaaag             |
| primer | Mu-BtsI-GG-R       | CACACCAGGTCTCAGCTaagcttgaCACtgcgacgaaaaacgcgaaag              |
| primer | Mu-EarI-GG-F       | CACACACGGTCTCAGTCCagatctgaagAAgAgcacgaaaaacgcgaaagcg          |
| primer | Mu-EarI-GG-R       | CACACCAGGTCTCAGCTaagcttgaagAAgAgcacgaaaaacgcgaaagcg           |
| primer | Mu-BsaI-2-GG-F     | CACACACGGTCTCAGTCCagatctgaagGAgACcagaaaaacgcgaaagcgtttc       |
| primer | Mu-BsaI-2-GG-R     | CACACCAGGTCTCAGCTaagcttgaagGAgACcagaaaaacgcgaaagcgtttc        |
| primer | Mu-BsmBI-1-GG-F    | CACACCAGGTCTCAGTCCagatctgaagGAgACGacgaaaaacgcgaaagcgtttcac    |
| primer | Mu-BsmBI-1-GG-R    | CACACACGGTCTCAGCTaagcttgaagGAgACGacgaaaaacgcgaaagcgtttcac     |
| primer | Mu-BsmBI-2-GG-F    | CACACCAGGTCTCAGTCCagatctgaagcggGAGacgaaaaacgcgaaagcgtttcac    |
| primer | Mu-BsmBI-2-GG-R    | CACACACGGTCTCAGCTaagcttgaagcggGAGacgaaaaacgcgaaagcgtttcac     |
| primer | Mu-BsaI-1-GG-F     | CACACCAGGTCTCAGTCCagatctgaagcggAgACgaaaaacgcgaaagcgtttcac     |
| primer | Mu-BsaI-1-GG-R     | CACACACGGTCTCAGCTaagcttgaagcggAgACgaaaaacgcgaaagcgtttcac      |
| primer | Mu-BsmBI-3-GG-F    | CACACACGGTCTCAGTCCagatctgaagcggAGAcGcgaaaaacgcgaaagcgtttcac   |
| primer | Mu-BsmBI-3-GG-R    | CACACCAGGTCTCAGCTaagcttgaagcggAGAcGcgaaaaacgcgaaagcgtttcac    |
| primer | Mu-Bpii-GG-F       | CACACACGGTCTCAGTCCagatctgaagcggTcTTCgaaaaacgcgaaagcgtttcac    |
| primer | Mu-Bpii-GG-R       | CACACCAGGTCTCAGCTaagcttgaagcggTcTTCgaaaaacgcgaaagcgtttcac     |
| primer | BsaI-M1-Cmr-1-GG-F | CACACCAGGTCTCAGTCCagatctgCaTcggAgACgaaaaacgcgaaagcgtttcac     |
| primer | BsaI-M1-Cmr-1-GG-R | CACACACGGTCTCAGCTaagcttgaCgcggAgACgaaaaacgcgaaagcgtttcac      |
| primer | cpEGFP-M1-GG-F     | CACACCAGGTCTCACATCTtataactctttatcatggccgacaagc                |
| primer | cpEGFP-M1-GG-R     | CACACCAGGTCTCTACGcgttgaagttatattcaagccttatggcccag             |
| primer | cpEGFP-MBP170-F0   | CACACCAGGTCTCAGTTCtataactctttatcatggccgacaagc                 |
| primer | cpEGFP-MBP170-F1   | CACACCAGGTCTCAGTTCVSTtataactctttatcatggccgacaagc              |
| primer | cpEGFP-MBP170-F2   | CACACCAGGTCTCAGTTCVSTVSTtataactctttatcatggccgacaagc           |
| primer | cpEGFP-MBP170-F3   | CACACCAGGTCTCAGTTCVSTVSTVSTtataactctttatcatggccgacaagc        |
| primer | cpEGFP-MBP170-F4   | CACACCAGGTCTCAGTTCVSTVSTVSTVSTtataactctttatcatggccgacaagc     |
| primer | cpEGFP-MBP170-R0   | CACACCAGGTCTCTACTTggtgaagttatattcaagccttatggcccag             |
| primer | cpEGFP-MBP170-R1   | CACACCAGGTCTCTACTTASBgttgaagttatattcaagccttatggcccag          |
| primer | cpEGFP-MBP170-R2   | CACACCAGGTCTCTACTTASBASBgttgaagttatattcaagccttatggcccag       |
| primer | cpEGFP-MBP170-R3   | CACACCAGGTCTCTACTTASBASBASBgttgaagttatattcaagccttatggcccag    |
| primer | cpEGFP-MBP170-R4   | CACACCAGGTCTCTACTTASBASBASBASBgttgaagttatattcaagccttatggcccag |
| primer | MBP-170-F          | CACACCAGGTCTCTaagtatgaaacggcaagtacgacattaaagac                |
| primer | MBP-170-R          | CACACCAGGTCTCAgaacgataacccccgtcag                             |
| primer | Tre-333/334-F0     | CACACCAGGTCTCATCCGtcttataactctttatcatggc                      |
| primer | Tre-333/334-F1     | CACACCAGGTCTCATCCGVVtcttataactctttatcatggc                    |
| primer | Tre-333/334-F2     | CACACCAGGTCTCATCCGVVVCtcttataactctttatcatggc                  |
| primer | Tre-333/334-F3     | CACACCAGGTCTCATCCGVVVCVVCtcttataactctttatcatggc               |
| primer | Tre-333/334-R0     | CACACCAGGTCTCAGACCGttgaagttatattcaagccttatggc                 |
| primer | Tre-333/334-R1     | CACACCAGGTCTCAGACCBGGttgaagttatattcaagccttatggc               |
| primer | Tre-333/334-R2     | CACACCAGGTCTCAGACCBGBBGGttgaagttatattcaagccttatggc            |
| primer | Tre-333/334-R3     | CACACCAGGTCTCAGACCBGBBGBGGttgaagttatattcaagccttatggc          |
| primer | Tre-G334-F         | CACACCAGGTCTCAGGTcgcgtagacgtatacgac                           |
| primer | Tre-P333-R         | CACACCAGGTCTCACggattccaaccaaattcatcgc                         |
